# Supplementary material for: The pan-cancer lncRNA PLANE regulates an alternative splicing program to promote cancer pathogenesis
Source: PubMed Central journal article supplement (PMC8213729; doi:10.1038/s41467-021-24099-4), 2021-06-18
Supplement: 41467_2021_24099_MOESM1_ESM.pdf [file 41467_2021_24099_MOESM1_ESM.pdf]

Supplementary Figure 1

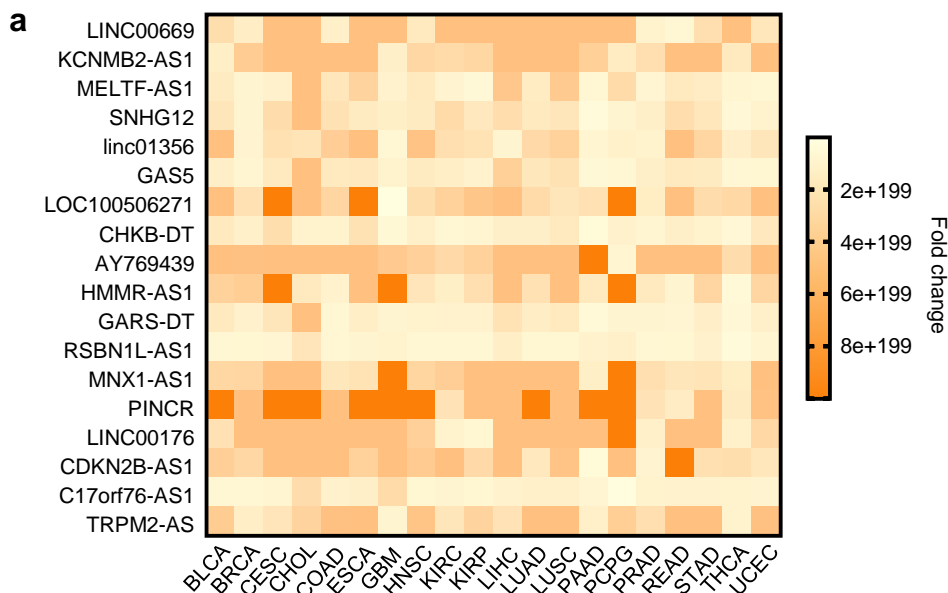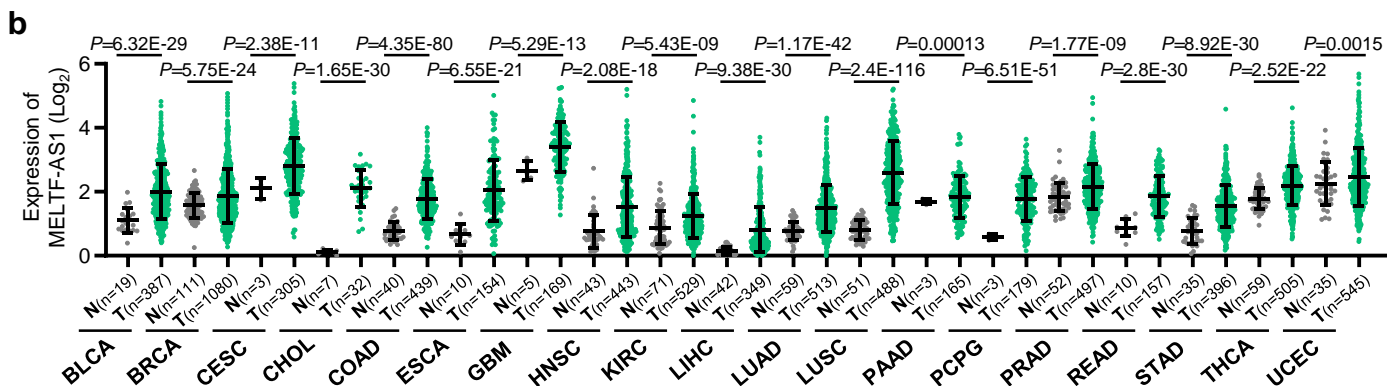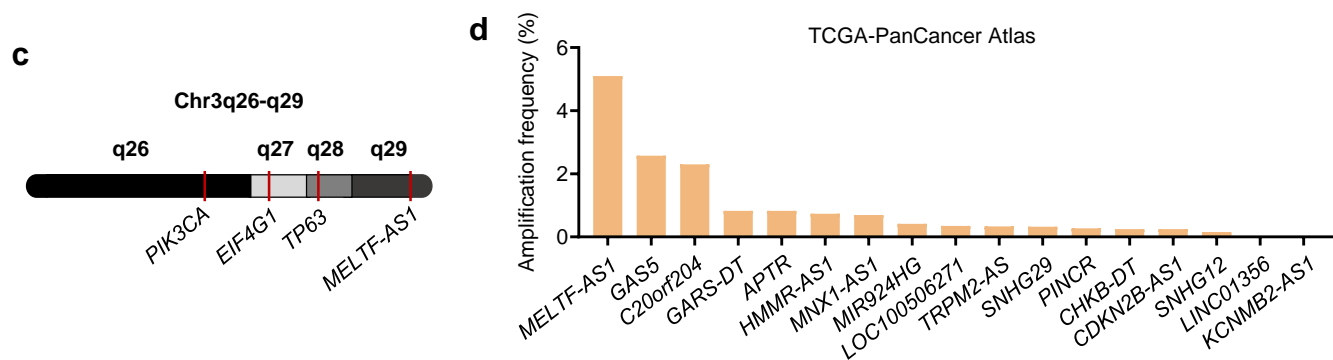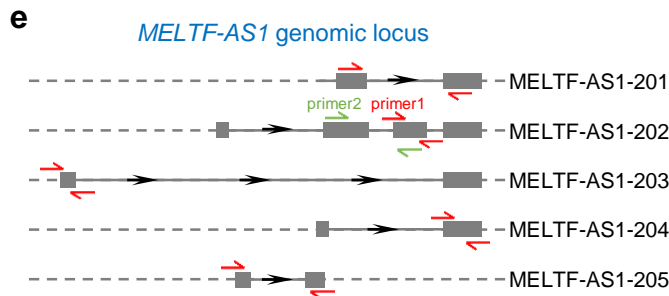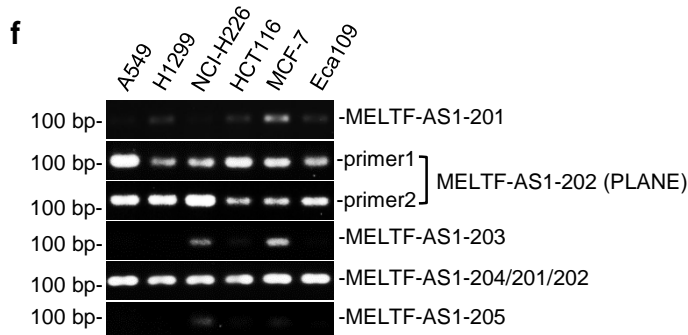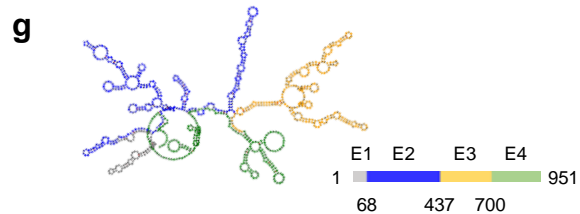

### **Supplementary Figure 1. MELTF-AS1 (PLANE) is a pan-cancer-associated lncRNA**

**a** Identification of pan-cancer-associated lncRNAs through analysis of the lncRNA expression data from the TCGA dataset. Eighteen lncRNAs that are increased in at least 19 of 20 types of cancer relative to corresponding normal tissues are depicted using a heatmap. The data are fold changes in cancer compared with normal tissues. BLCA: bladder urothelial carcinoma; BRCA: breast invasive carcinoma; CESC: cervical squamous cell carcinoma and endocervical adenocarcinoma; CHOL: cholangiocarcinoma; COAD: colon adenocarcinoma; ESCA: esophageal carcinoma; GBM: glioblastoma multiforme; HNSC: head and neck squamous cell carcinoma; KIRC: kidney renal clear cell carcinoma; KIRP: kidney renal papillary cell carcinoma; LIHC: liver hepatocellular carcinoma; LUAD: lung adenocarcinoma; LUSC: lung squamous cell carcinoma; PAAD: pancreatic adenocarcinoma; PCPG: pheochromocytoma and paraganglioma; PRAD: prostate adenocarcinoma; READ: rectum adenocarcinoma; STAD: stomach adenocarcinoma; THCA: thyroid carcinoma; UCEC: uterine corpus endometrial carcinoma.

**b** MELTF-AS1 is upregulated in diverse types of cancer compared with corresponding normal tissues as revealed by analysis of the lncRNA expression data in the TCGA dataset. Data are mean  $\pm$  s.d.; two-tailed Student's *t*-test. N: normal tissues; T: tumour tissues.

**c** Schematic illustration of the genomic location of the *MELTF-AS1* gene and representative protein-coding genes that are involved in cancer pathogenesis at chromosome 3q26-29.

**d** Analysis of copy-number alteration data of the PanCancer Atlas of the TCGA showing that *MELTF-AS1* was the most frequently amplified gene among those that encode the pan-cancer upregulated lncRNAs as shown in **a**.

**e** Schematic illustration of the five annotated MELTF-AS1 transcript isoforms. Filled boxes represent exons. The primers used for specific detection of each isoform were depicted in red and green. Primers directed against MELTF-AS1-204 span a common region shared by MELTF-AS1-201 and MELTF-AS1-202.

**f** PCR analysis showing that the longest isoform of MELTF-AS1, MELTF-AS1-202 (PLANE) was markedly more abundant than other isoforms in the indicated cancer cell lines. Data are representatives of 3 independent experiments.

**g** The secondary structure model of PLANE is predicted based on minimum free energy algorithm.

Source data are provided as a Source Data file.

## Supplementary Figure 2

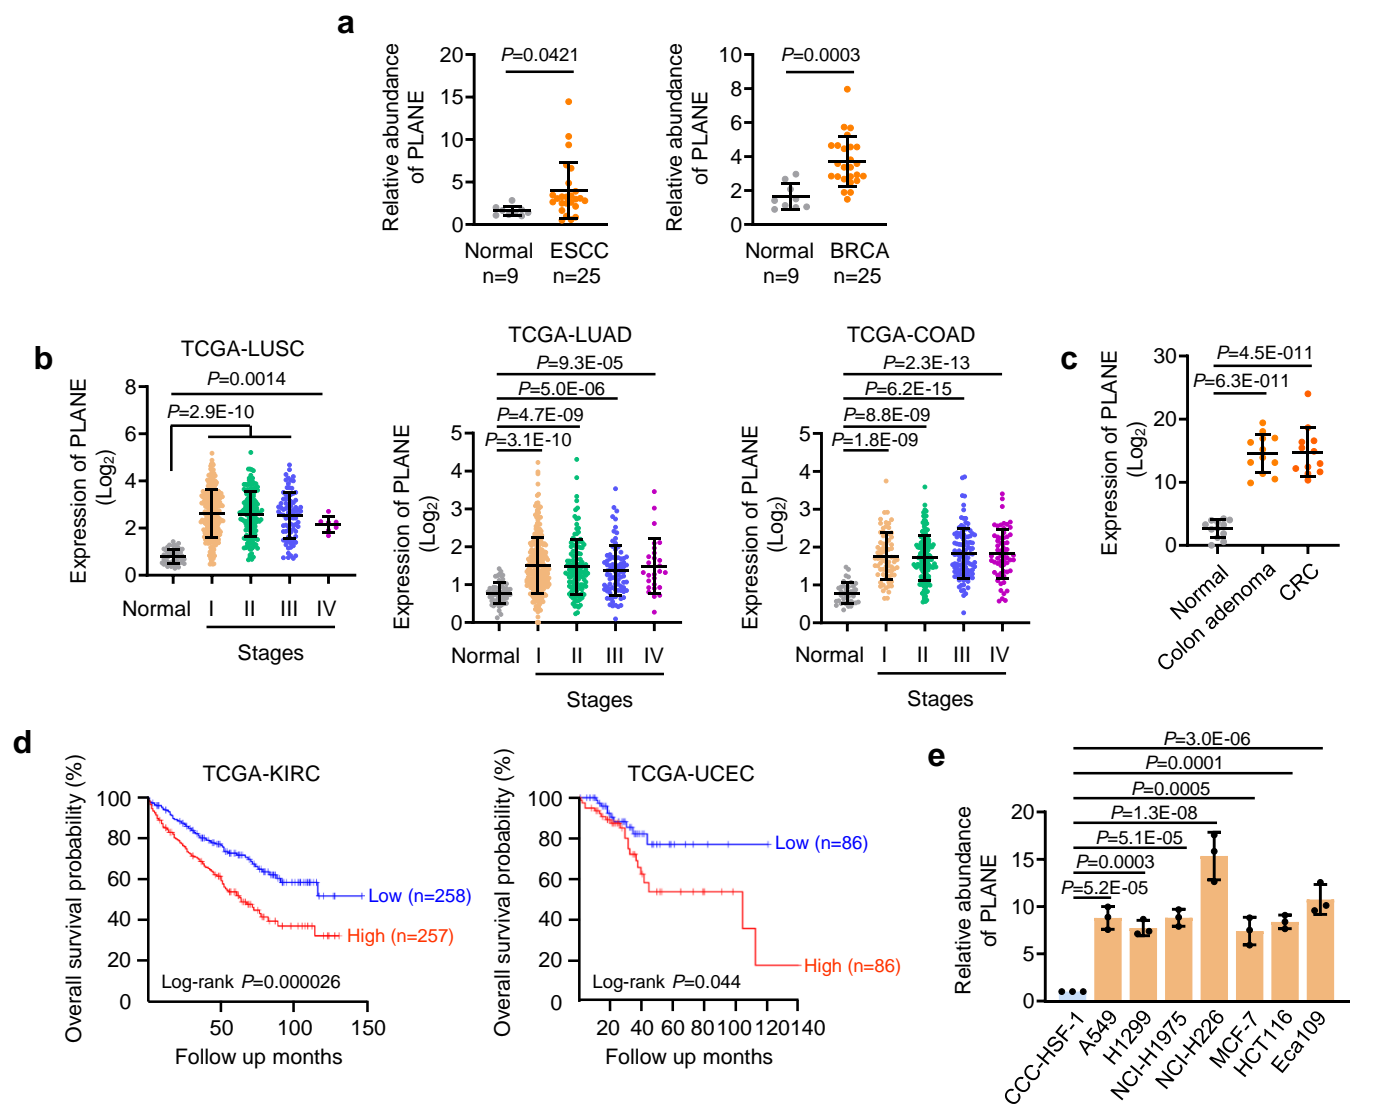

### Supplementary Figure 2. PLANE is upregulated at early stages during cancer pathogenesis

**a** qPCR analysis of PLANE expression from esophageal squamous cell carcinoma (ESCC; n=25) and breast carcinoma (BRCA; n=25) tissues and corresponding adjacent normal tissues. The expression of PLANE in one of corresponding adjacent normal tissues was arbitrarily designated as 1. Data are mean  $\pm$  s.d.; two-tailed Student's *t*-test.

**b** Analysis of the TCGA data showing that PLANE expression levels did not differ among tumours of different stages in LUSC, LUAD and COAD. TCGA-LUSC: Normal (n=51); Stage I (n=239); Stage II (n=154); Stage III (n=82); Stage IV (n=7). TCGA-LUAD: Normal (n=59); Stage I (n=273); Stage II (n=124); Stage III (n=84); Stage IV (n=27). TCGA-COAD: Normal (n=39); Stage I (n=74); Stage II (n=146); Stage III (n=104); Stage IV (n=61). Data are mean  $\pm$  s.d.; one-way ANOVA followed by Tukey's multiple comparisons test.

**c** PLANE expression was upregulated in colon adenoma tissues (n = 12) compared with normal colon epithelial tissues (n = 12), whereas there was no significant difference in PLANE expression levels between colon adenoma and colon cancer tissues (n = 12) as determined by qPCR. Data are mean  $\pm$  s.d.; one-way ANOVA followed by Tukey's multiple comparisons test.

**d** Kaplan-Meier analysis of the probability of overall survival of kidney clear cell carcinoma (KIRC; n=515) and uterine corpus endometrial carcinoma (UCEC; n=172) patients derived from the TCGA dataset using the median of PLANE levels as the cutoff. The log rank test.

**e** PLANE was expressed at higher levels in the indicated cancer cell lines than the normal human fibroblast cell line CCC-HSF-1. Data are mean  $\pm$  s.d.; n = 3 independent experiments, one-way ANOVA followed by Tukey's multiple comparisons test.

Source data are provided as a Source Data file.

Supplementary Figure 3

**a**

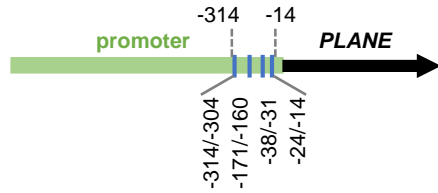

**b**

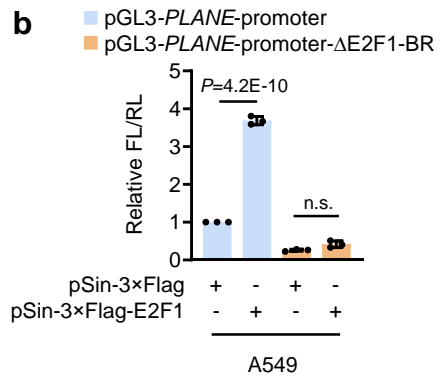

**c**

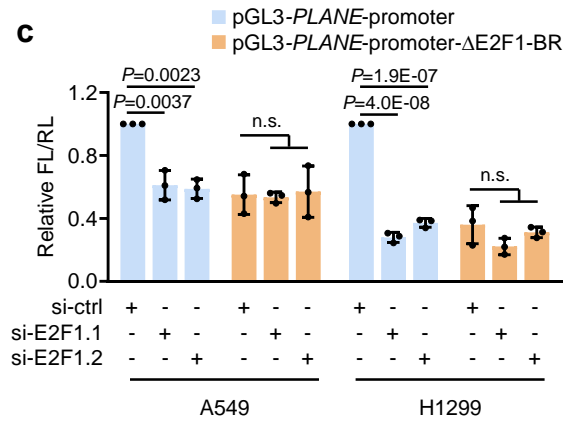

**d**

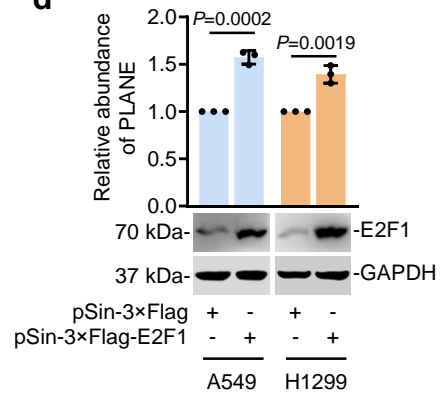

**e**

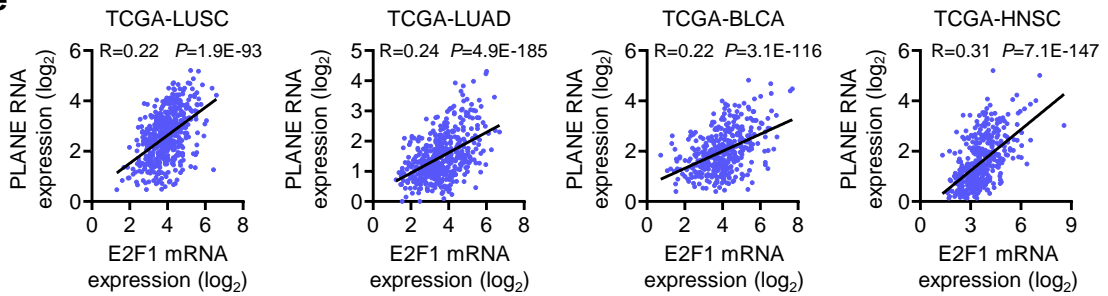

**f**

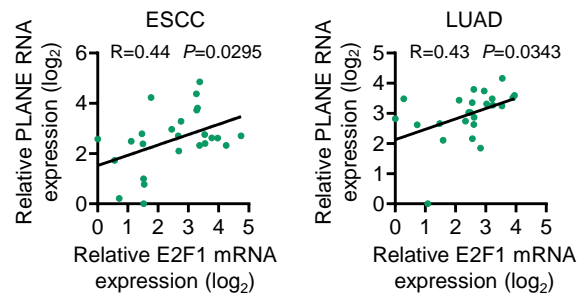



### **Supplementary Figure 3. E2F1 transcriptionally activates PLANE expression**

**a** Schematic illustration of multiple consensus E2F1 binding motifs (blue bars) located to the -314/-14 region of the proximal promoter of *PLANE* gene.

**b** Overexpression of E2F1 enhanced the transcriptional activity of a *PLANE* reporter construct with the intact E2F1 binding region (BR) (pGL3-*PLANE*-promoter) but did not affect the activity of a construct with the E2F1-BR deleted (pGL3-*PLANE*-promoter- $\Delta$ E2F1-BR) in A549 cells. Data are mean  $\pm$  s.d.; n = 3 independent experiments, one-way ANOVA followed by Tukey's multiple comparisons test. FL: Firefly luciferase activity; RL: Renilla luciferase activity.

**c** SiRNA knockdown of E2F1 reduced the transcriptional activity of a *PLANE* reporter construct with the intact E2F1-BR (pGL3-*PLANE*-promoter) but did not affect the activity of a construct with the E2F1-BR deleted (pGL3-*PLANE*-promoter- $\Delta$ E2F1-BR). Data are mean  $\pm$  s.d.; n = 3 independent experiments, one-way ANOVA followed by Tukey's multiple comparisons test.

**d** Overexpression of E2F1 caused upregulation of *PLANE* in A549 and H1299 cells. Data are mean  $\pm$  s.d. or representatives; n = 3 independent experiments, two-tailed Student's *t*-test.

**e** Linear regression analysis of the relationship between *PLANE* and E2F1 mRNA expression in the LUSC, LUAD, bladder urothelial carcinoma (BLCA) and head and neck squamous cell carcinoma (HNSC) datasets derived from the TCGA. Two-tailed Student's *t*-test.

**f** Linear regression analysis of the relationship between *PLANE* and E2F1 mRNA expression in the ESCC (n=25) and LUAD (n=24) tissues. The expression of *PLANE* and E2F1 was measured using qPCR. The lowest expression of *PLANE* or E2F1 was arbitrarily designated as 1. Two-tailed Student's *t*-test.

Source data are provided as a Source Data file.

## Supplementary Figure 4

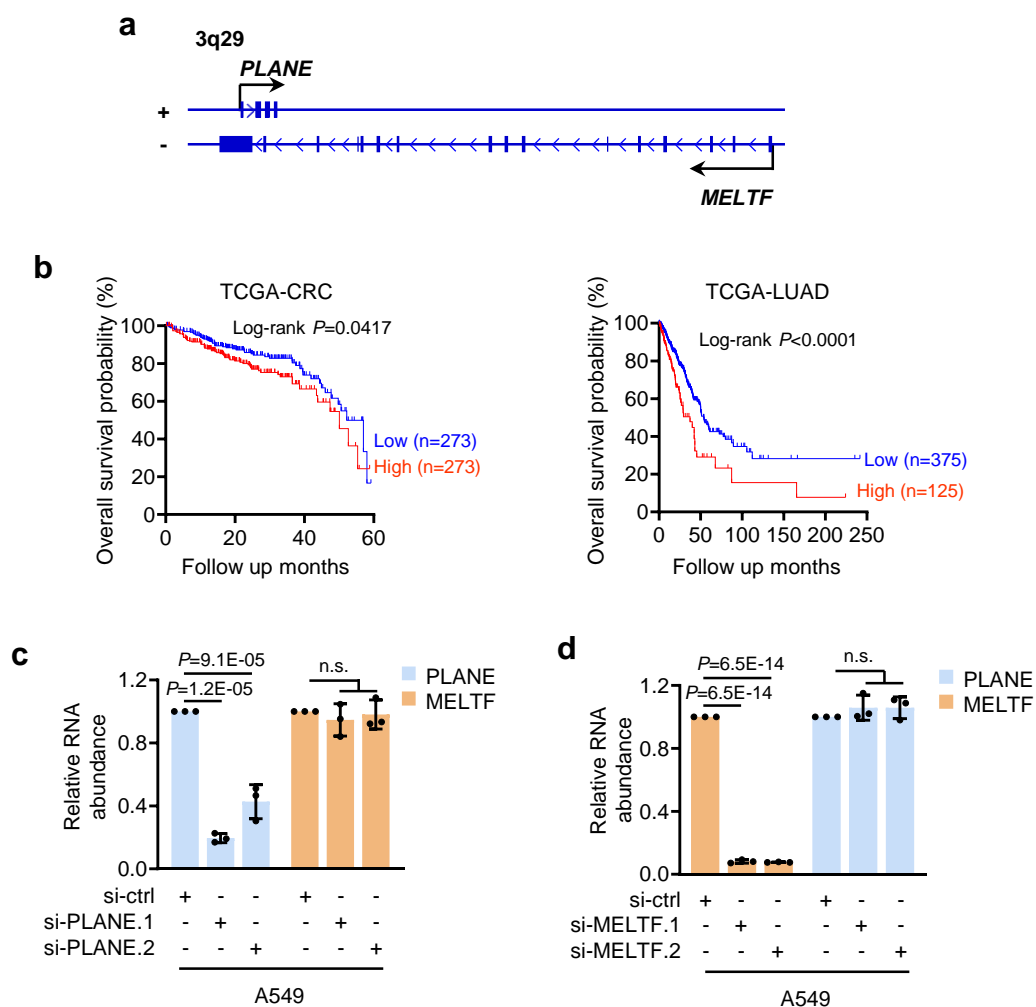

### Supplementary Figure 4. *PLANE* does not affect the expression of its neighbour gene *MELTF*

**a** Schematic illustration of the genomic location of the *PLANE* and *MELTF* genes.

**b** Kaplan-Meier analysis of the probability of overall survival of colorectal carcinoma (CRC; n=546) and lung adenocarcinoma (LUAD; n=500) patients derived from the TCGA dataset using the median or quartile of *MELTF* levels as the cutoff, respectively. The log rank test.

**c** Knockdown of *PLANE* did not impinge on *MELTF* expression in A549 cells. Data are mean  $\pm$  s.d.; n = 3 independent experiments, one-way ANOVA followed by Tukey's multiple comparisons test.

**d** Knockdown of *MELTF* did not impact *PLANE* expression in A549 cells. Data are mean  $\pm$  s.d.; n = 3 independent experiments, one-way ANOVA followed by Tukey's multiple comparisons test.

Source data are provided as a Source Data file.

## Supplementary Figure 5

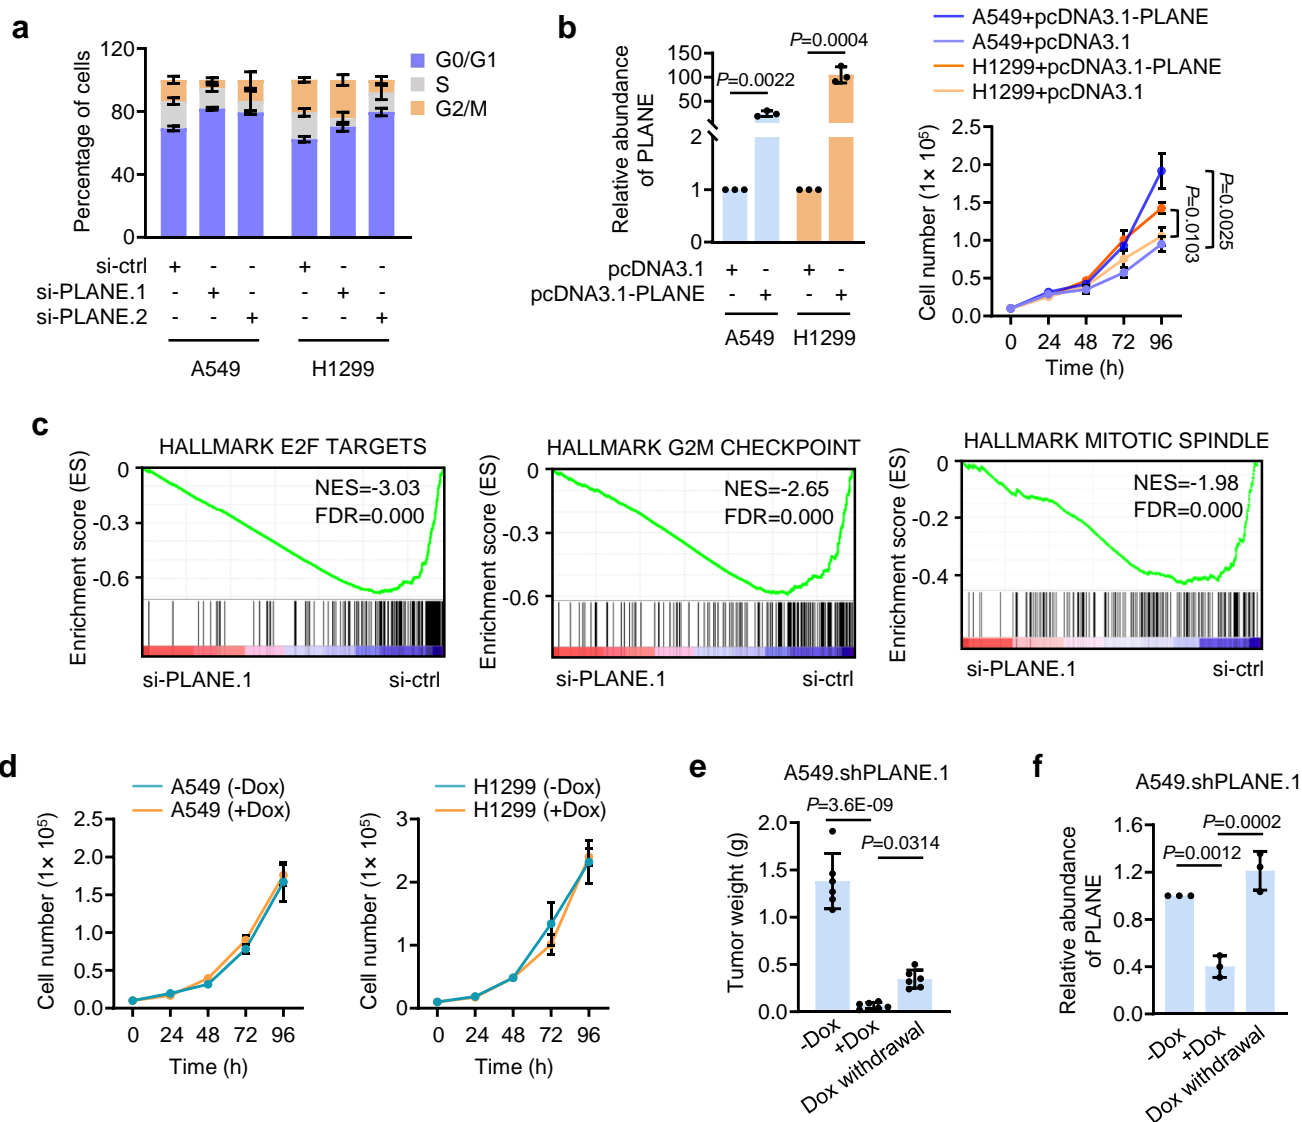

### Supplementary Figure 5. PLANE promotes cancer cell proliferation

**a** SiRNA knockdown of PLANE caused cell cycle arrest at G0/G1 phase in A549 and H1299 cells as shown by propidium iodide staining followed by flow cytometry analysis. Data are mean  $\pm$  s.d.;  $n = 3$  independent experiments.

**b** Overexpression of PLANE (left) promoted cell proliferation as shown by accelerated cell number increases (right) in A549 and H1299 cells. Data are mean  $\pm$  s.d.;  $n = 3$  independent experiments, two-tailed Student's *t*-test.

**c** GSEA of RNA-seq data from A549 cells.  $n=2$  experimental repeats. NES, normalised enrichment score; FDR, false discovery rate.

**d** Doxycycline (Dox, 500nM) treatment did not impinge on cell number increases in A549 and H1299 cells. Data are mean  $\pm$  s.d.;  $n = 3$  independent experiments.

**e & f** Tumour weights (**e**) ( $n=6$  biologically independent animals) and PLANE expression in representative samples ( $n=3$  biologically independent animals) (**f**) of A549.shPLANE xenografts in nu/nu mice with or without treatment with doxycycline (Dox, 2 mg/ml supplemented with 10 mg/ml sucrose in drinking water) and cessation of Dox treatment. Data are mean  $\pm$  s.d.; one-way ANOVA followed by Tukey's multiple comparisons test.

Source data are provided as a Source Data file.

## Supplementary Figure 6

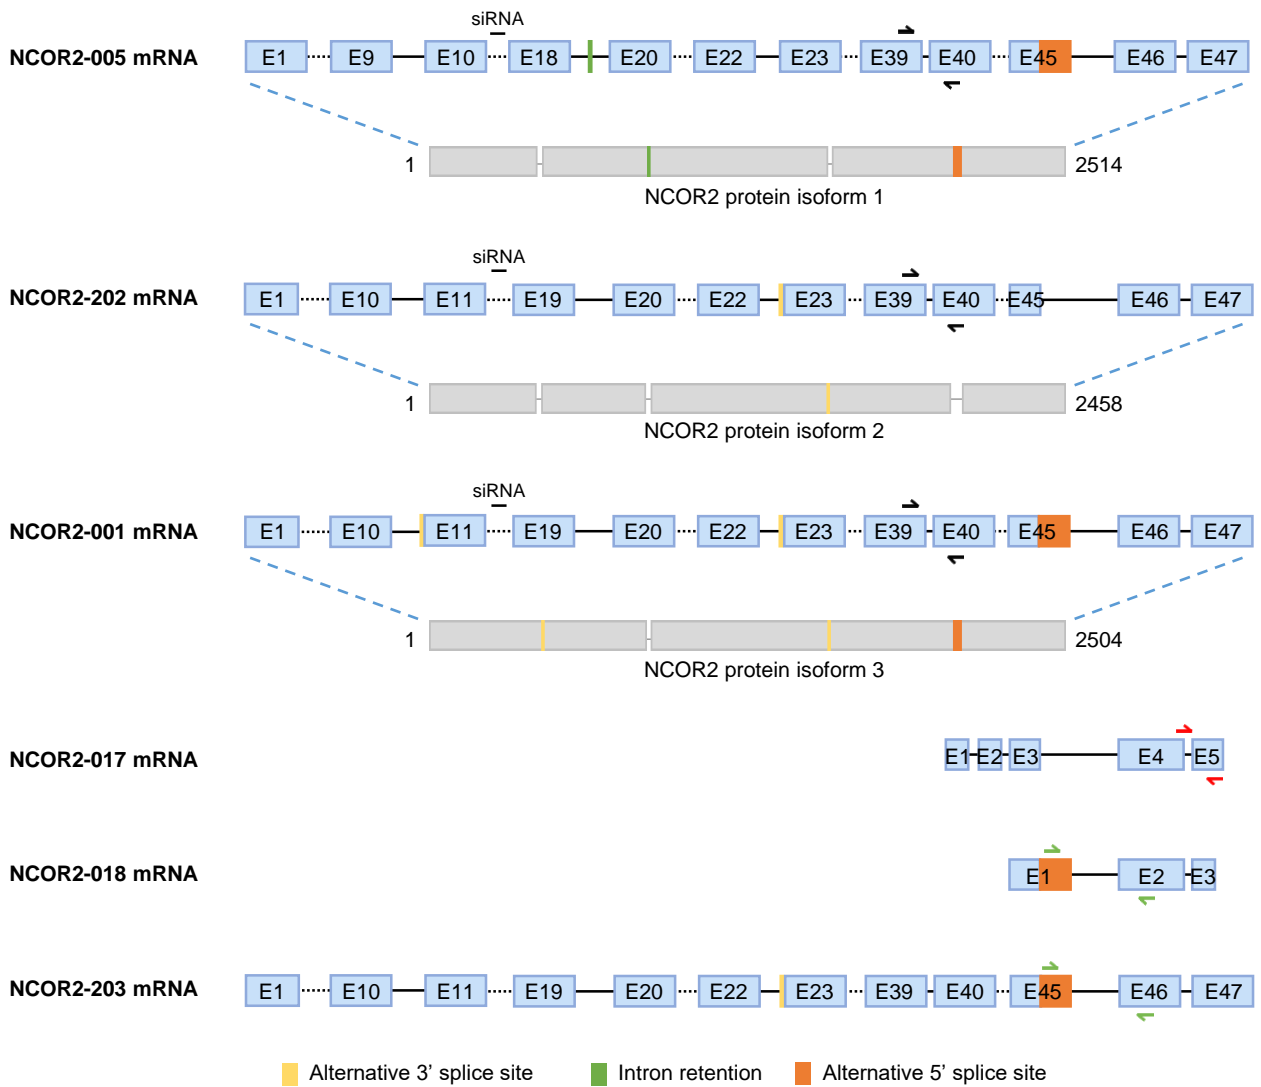

### Supplementary Figure 6. Schematic illustration of the NCOR2 mRNA variants and protein isoforms

Schematic illustration of the NCOR2 mRNA variants NCOR2-005, -202, -001, -017, -018 and -203, and NCOR2 protein isoforms NCOR2-1, -2 -3 encoded individually by NCOR2-005, -202 and -001. E: exon. Black arrows indicate primers recognising a common region present in NCOR2-001, -202, -005 as well as -002, -201 and -203. Red arrows indicate primers recognising NCOR2-017. Green arrows indicate primers recognising a common region present in NCOR2-018 and -203.

## Supplementary Figure 7

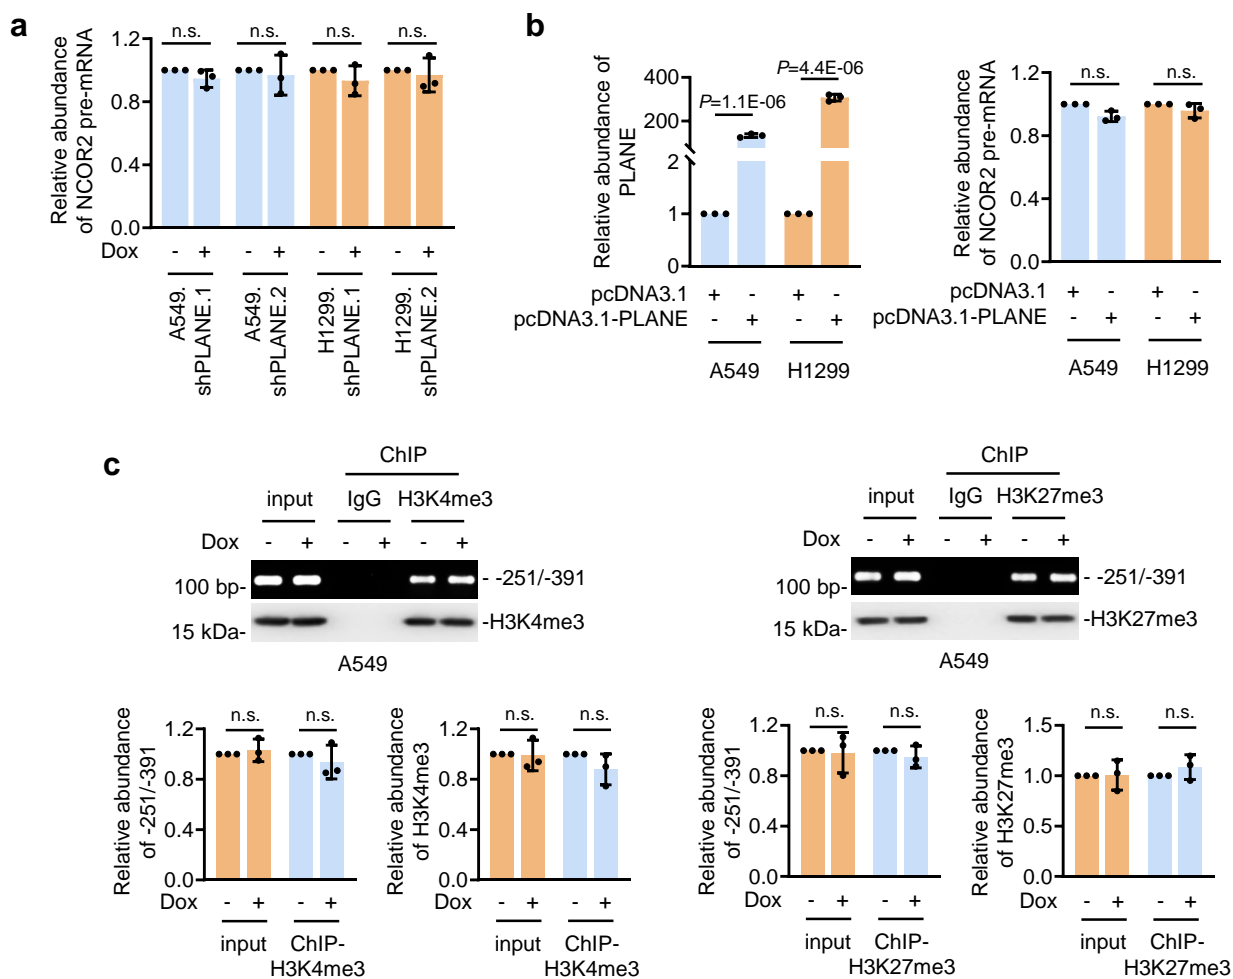

### Supplementary Figure 7. PLANE does not regulate NCOR2 transcription

**a & b** Neither induced knockdown (**a**) nor overexpression (**b**) of PLANE impinged on NCOR2 pre-mRNA expression. Data are mean  $\pm$  s.d.;  $n = 3$  independent experiments, two-tailed Student's *t*-test.

**c** Induced knockdown of PLANE did not affect the enrichment of the transcriptional activation mark H3K4me3 and the transcriptional repression mark H3K27me3 to the *NCOR2* promoter in A549 and H1299 cells as shown using chromatin immunoprecipitation (ChIP) assays. Relative abundance of -251/-391 region within *NCOR2* promoter and relative abundance of H3K4me3 and H3K27me3 protein levels were quantified. Data are representatives or mean  $\pm$  s.d.;  $n = 3$  independent experiments, two-tailed Student's *t*-test.

Source data are provided as a Source Data file.

Supplementary Figure 8

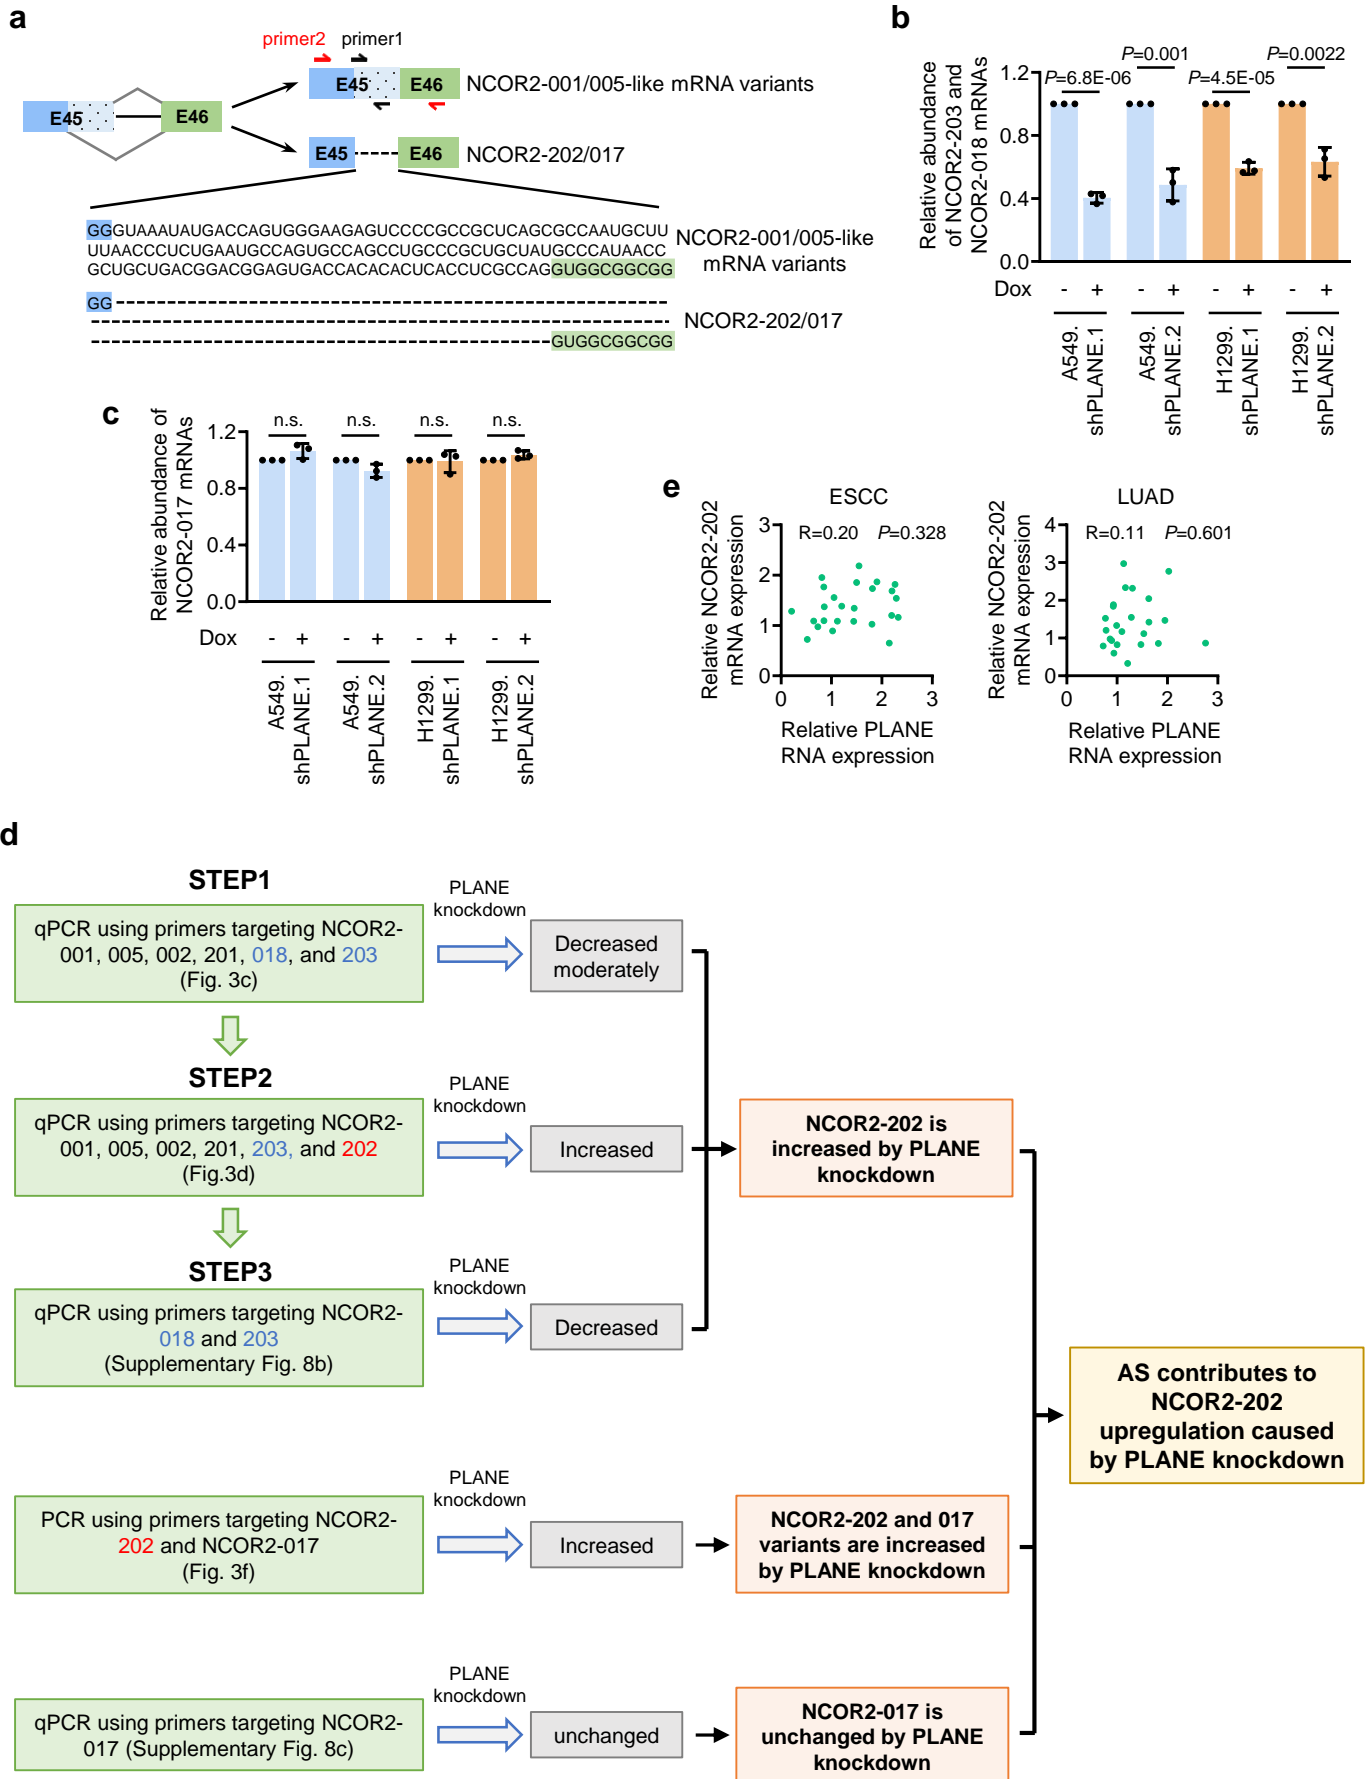

### **Supplementary Figure 8. PLANE regulates NCOR2 pre-mRNA AS**

**a** Schematic illustration of the sequence overlaps between NCOR2-202/017 and NCOR2-001/005-like mRNA variants and the generation of NCOR2-202 through an alternative 5' splice site. Primer pair 1 recognising the 1-138 fragment of intron 45 that is not contained by NCOR2-202 was used to detect NCOR2-001 and NCOR2-005 as well as NCOR2-002, NCOR2-018, NCOR2-201 and NCOR2-203. Primer pair 2 flanking the splice site at the junction of exon/intron 45 was used to detect the NCOR2-202-generating AS event.

**b** qPCR analysis showed the levels of NCOR2 AS variants NCOR2-203 and NCOR-018 were reduced in cells with PLANE knocked down. Data are mean  $\pm$  s.d.; n = 3 independent experiments, two-tailed Student's *t*-test.

**c** qPCR analysis showed that induced knockdown of PLANE did not affect the expression level of NCOR2 AS variant NCOR2-017. Data are mean  $\pm$  s.d.; n = 3 independent experiments, two-tailed Student's *t*-test.

**d** The workflow of identification of the effect of AS on NCOR2-202 upregulation caused by PLANE knockdown.

**e** Linear regression analysis showed that there was no significant relationship between PLANE and NCOR2-202 expression levels in ESCC (n=25) and LUAD (n=24) tissues. Expression levels of PLANE and NCOR2-202 were quantitated using semi-quantitative RT-PCR. Two-tailed Student's *t*-test.

Source data are provided as a Source Data file.

## Supplementary Figure 9

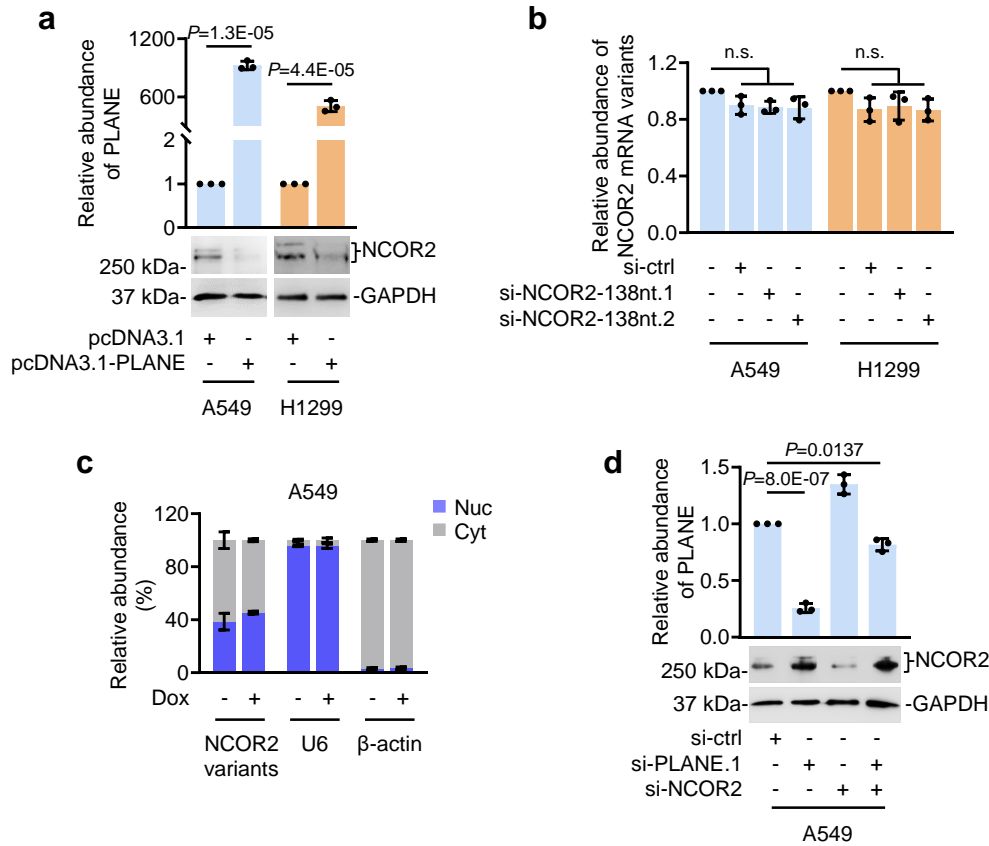

### Supplementary Figure 9. PLANE suppresses NCOR2 protein expression

**a** Overexpression of PLANE caused downregulation of NCOR2 at the protein level in A549 and H1299 cells. Data are representatives or mean  $\pm$  s.d.;  $n = 3$  independent experiments, two-tailed Student's *t*-test.

**b** Knockdown of NCOR2 using siRNAs targeting the 1-138 nucleotide (nt) fragment present in NCOR2-001/005-like variants but not NCOR2-202/017 within intron 45 did not reduce the expression levels of NCOR2 mRNA variants including NCOR2-001 and NCOR2-005 as well as NCOR2-002, NCOR2-018, NCOR2-201 and NCOR2-203. Data are mean  $\pm$  s.d.;  $n=3$  independent experiments, one-way ANOVA followed by Tukey's multiple comparisons test.

**c** qPCR analysis using primers spanning across a common region present in nine NCOR2 AS variants (NCOR2-202/001/005/017/015/022/018/201/203) showed that PLANE knockdown did not cause any significant changes in the proportions of NCOR2 AS variants distributing to nuclear and cytoplasmic fractions. U6 and  $\beta$ -actin RNA expression was included as controls for nuclear and cytoplasmic fractions, individually. Data are mean  $\pm$  s.d.;  $n = 3$  independent experiments, two-tailed Student's *t*-test. Cyt: cytoplasm; Nuc: nucleus.

**d** SiRNA knockdown of PLANE and NCOR2 in A549 cells. Data are mean  $\pm$  s.d. or representatives;  $n = 3$  independent experiments, one-way ANOVA followed by Tukey's multiple comparisons test.

Source data are provided as a Source Data file.



## Supplementary Figure 10

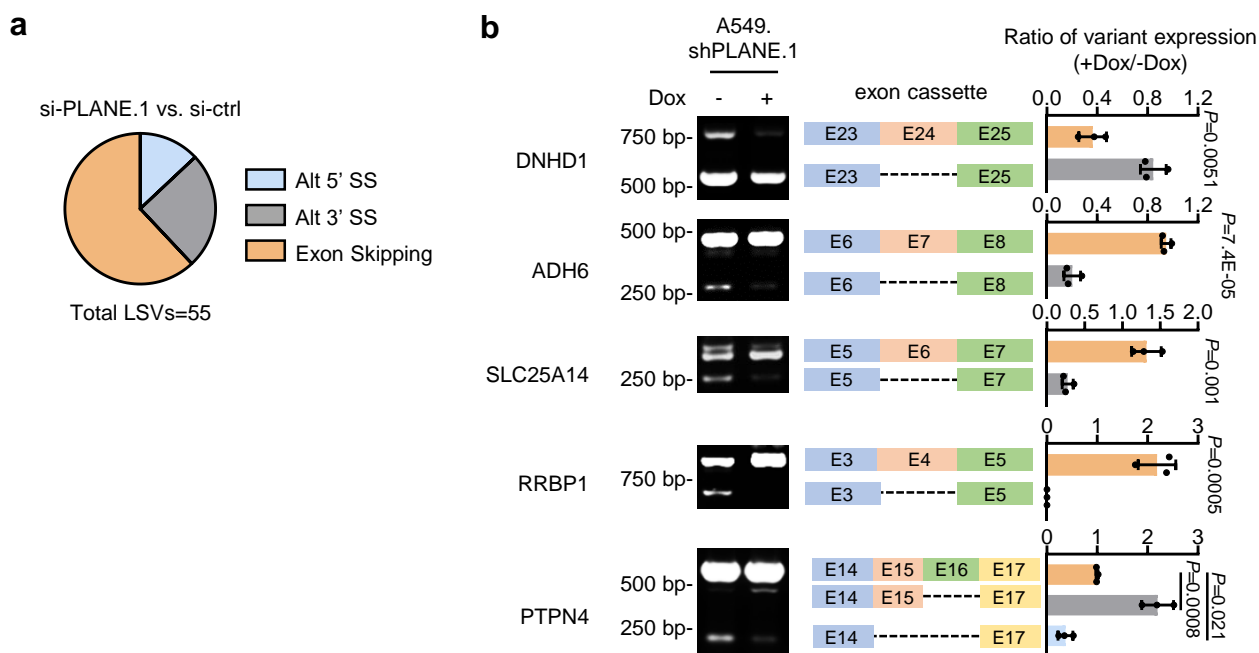

### Supplementary Figure 10. PLANE regulates AS of other pre-mRNAs

**a** MAJIQ analysis of RNA-seq data (two experimental repeats) showing the categorization of alternative splicing events caused by PLANE knockdown in A549 cells. LSVs, local splicing variations; Alt 5' SS, Alternative 5' splicing site; Alt 3' SS, Alternative 3' splicing site. MAJIQ, modelling alternative junction inclusion quantification.

**b** RT-PCR analysis of the indicated AS events using primers flanking PLANE-regulated alternative exons. Relative levels of relevant AS variants quantitated using densitometry are also shown. Data are representatives or mean  $\pm$  s.d.;  $n = 3$  independent experiments, two-tailed Student's *t*-test. DNHD1, Dynein Heavy Chain Domain 1; ADH6, Alcohol Dehydrogenase 6; SLC25A14, Solute Carrier Family 25 Member 14; RRBP1, Ribosome Binding Protein 1; PTPN4, Protein Tyrosine Phosphatase Non-Receptor Type 4.

Source data are provided as a Source Data file.

## Supplementary Figure 11

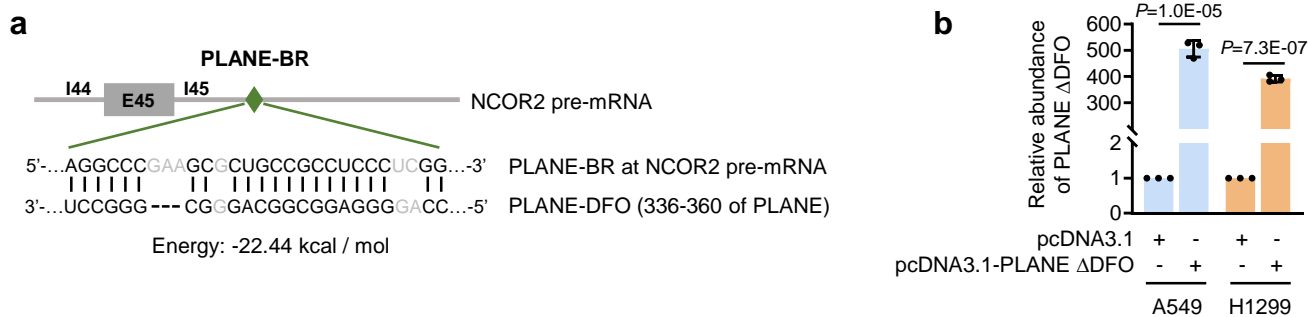

### Supplementary Figure 11. PLANE interacts with NCOR2 pre-mRNA

**a** Schematic illustration of base-pairing between the PLANE binding region (PLANE-BR) at intron 45 (I45) of the NCOR2 pre-mRNA and the duplex-forming oligonucleotides (DFO) of PLANE.

**b** Overexpression of a PLANE mutant with the DFO deleted (PLANE- $\Delta$ DFO) in A549 and H1299 cells. Data are mean  $\pm$  s.d.; n=3 independent experiments, two-tailed Student's *t*-test.

Source data are provided as a Source Data file.

Supplementary Figure 12

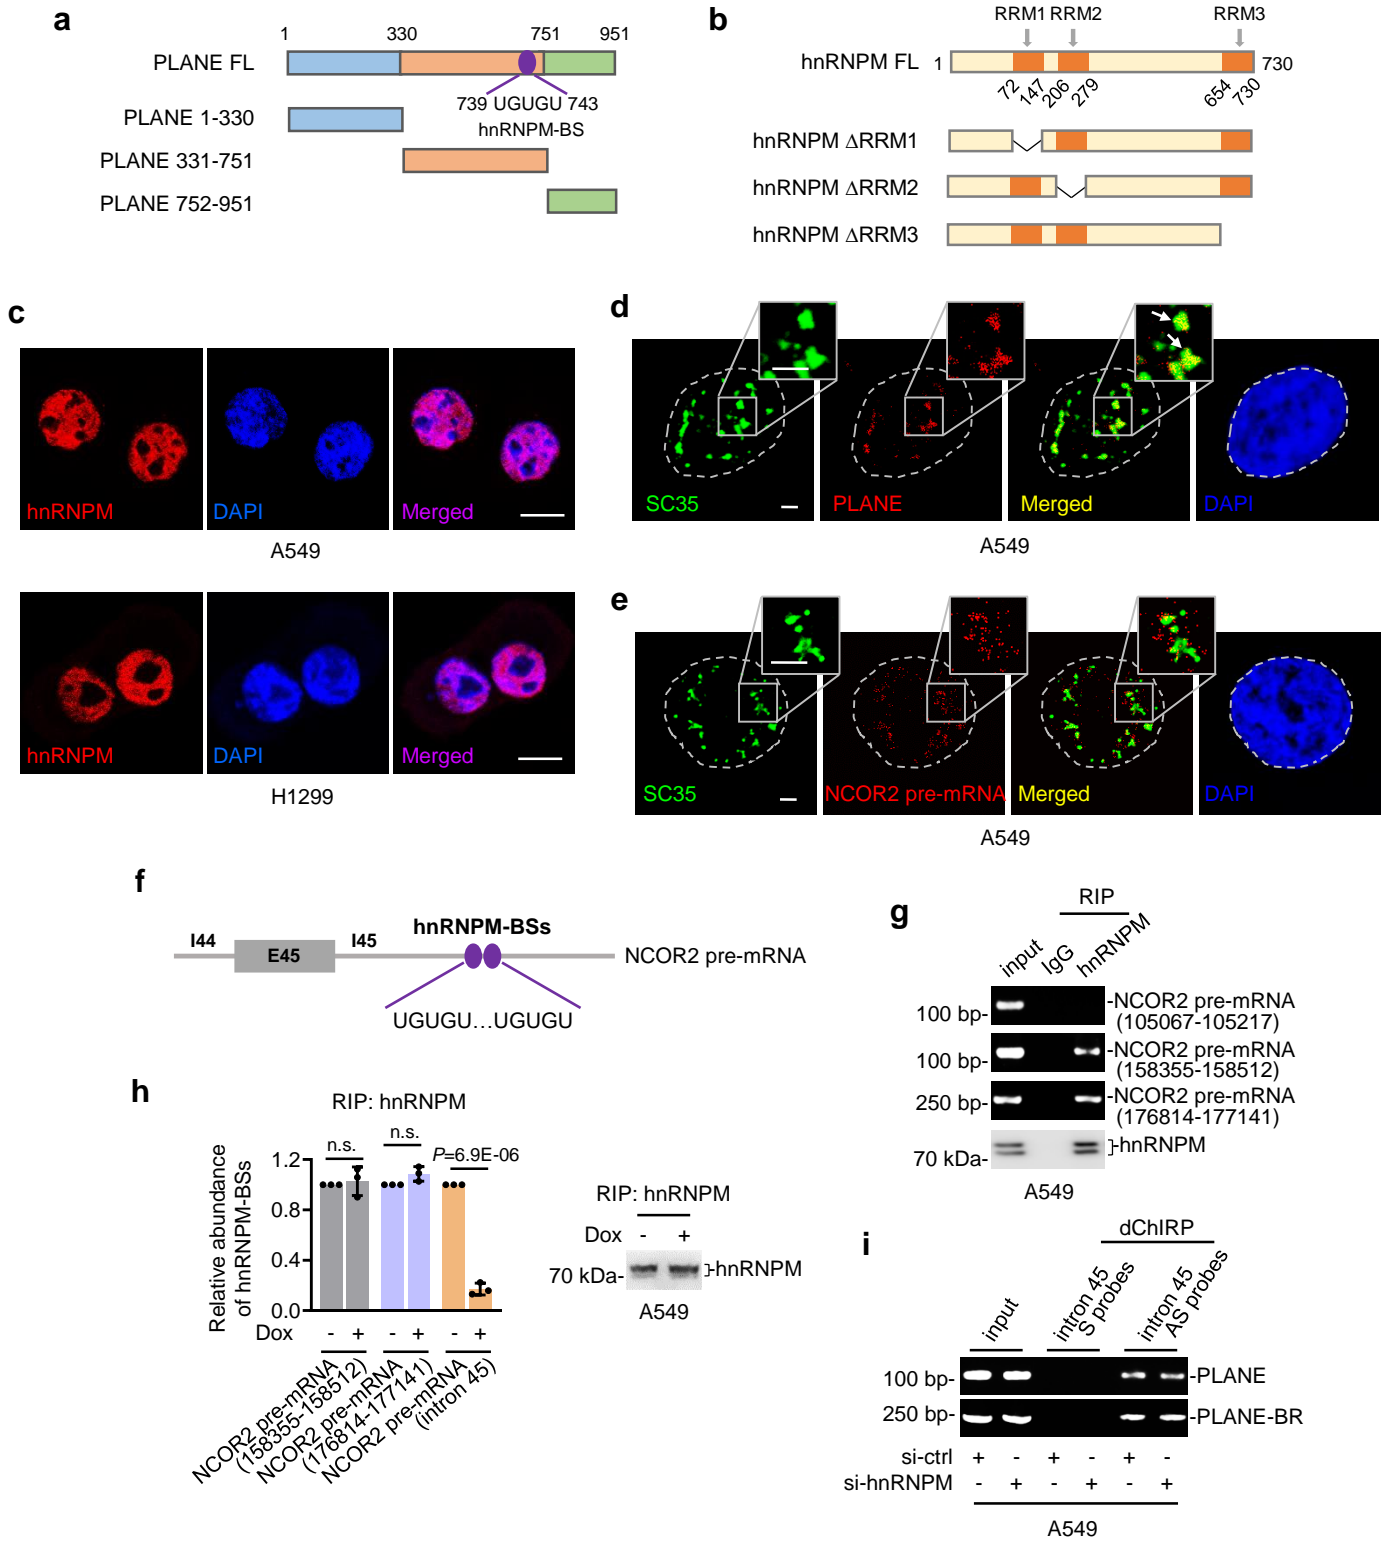

**Supplementary Figure 12. PLANE binds to hnRNPM and facilitates repression of the NCOR2-202-generating AS event**

**a** Schematic illustration of full-length PLANE (PLANE-FL) and the PLANE mutants (PLANE 1-330, PLANE 331-751 and PLANE 752-951) used in mapping experiments. The consensus hnRNPM binding site (hnRNPM-BS) within PLANE 331-751 region is also shown.

**b** Schematic illustration of full-length hnRNPM (hnRNPM FL) and the hnRNPM mutants with individual RNA recognition motifs (RRM1, RRM2 and RRM3) deleted.

**c** Representative confocal images of immunofluorescence staining of hnRNPM in A549 cells. DAPI was used to decorate nuclear DNA. Data shown are representatives of 3 independent experiments. Scale bar: 10  $\mu\text{m}$ .

**d** Dual colour confocal images showing that a proportion of SC35 immunostaining co-localises with PLANE within the nucleus of A549 cells. Data shown are representatives of 3 independent experiments. Scale bar: 2  $\mu\text{m}$

**e** Dual colour confocal images showing limited co-localisation between SC35 immunostaining and NCOR2 pre-mRNA within the nucleus of A549 cells. Data shown are representatives of 3 independent experiments. Scale bar: 2  $\mu\text{m}$

**f** Schematic illustration of the consensus hnRNPM-binding sites (hnRNPM-BSs) at intron 45 of the NCOR2 pre-mRNA.

**g** RIP assays in A549 cells showing co-precipitation between hnRNPM and NCOR2 pre-mRNA fragments 158355-158512 and 176814-177141 but not 105067-105217. Data shown are representative of 3 independent experiments.

**h** RIP assay showed that induced knockdown of PLANE decreased the amount of hnRNPM associated with the intron 45 of NCOR2 pre-mRNA but did not affect the association between hnRNPM with fragments 158355-158512 and 176814-177141 in A549 cells. Data are mean  $\pm$  s.d. or representatives; n = 3 independent experiments, two-tailed Student's *t*-test.

**i** PLANE was coprecipitated with a fragment at intron 45 of NCOR2 pre-mRNA containing the PLANE-BR in A549 cells with or without siRNA knockdown of hnRNPM as shown using dChIRP assays. Data are representatives of 3 independent experiments.

Source data are provided as a Source Data file.

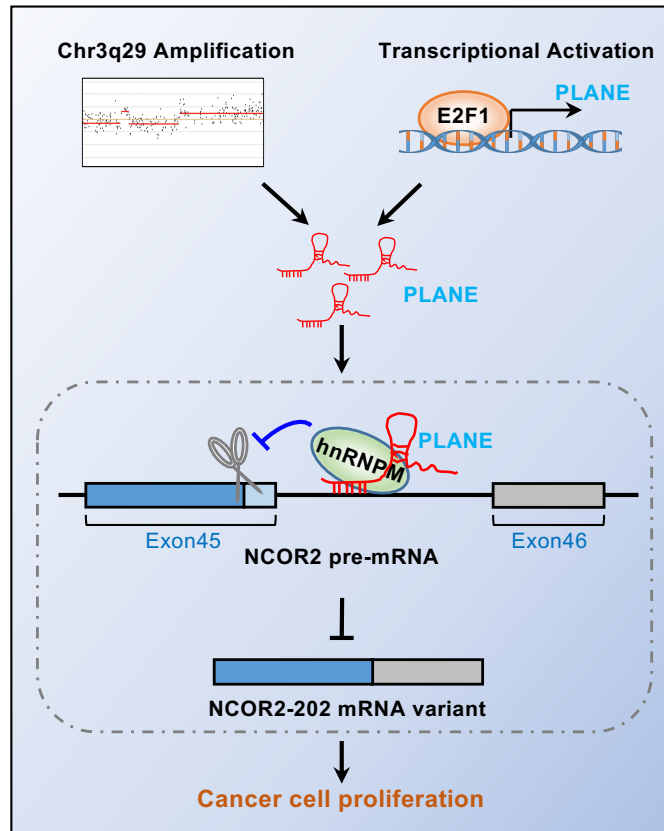

**Supplementary Figure 13. Schematic illustration PLANE facilitation of hnRNPM-mediated repression of the NCOR2-202-generating alternative splicing (AS) event to promote tumorigenesis**

PLANE is upregulated in diverse cancer types driven by genomic amplification and transcriptional activation by E2F1 and forms RNA-RNA duplex with the NCOR2 pre-mRNA and binds to hnRNPM. This facilitates the association of hnRNPM with the NCOR2 pre-mRNA at intron 45, leading to repression of the NCOR2-202-generating alternative splicing event, leading to promotion of tumorigenesis.

## Supplementary Figure 14

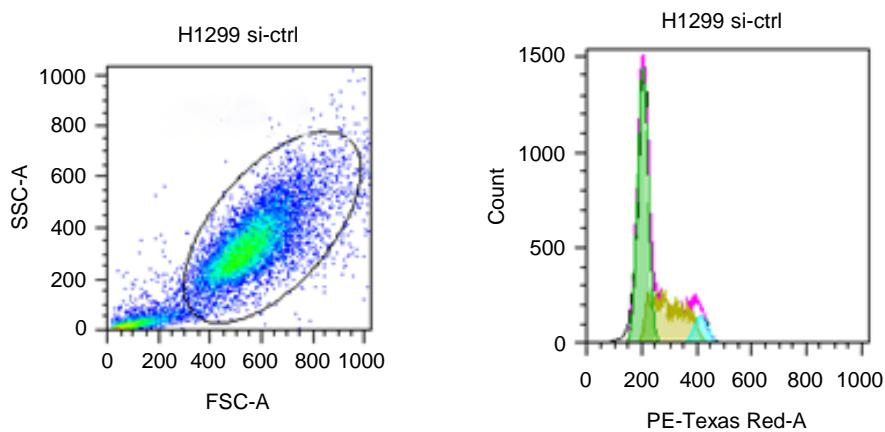

**Supplementary Figure 14. Representative FACS sequential gating strategy for cell cycle analysis. (Related to Supplementary Figure 5a).** Left panel demonstrates the gating strategy on a SSC vs FSC plot following capture of 10,000 events on a FACSCanto flow cytometer (BD Biosciences). This gate setting used in all subsequent sample runs. Right panel demonstrates typical cell cycle plot obtained using these gate settings.

## Supplementary Tables

**Supplementary Table 1. Summary of clinicopathological characteristics of the cohort of 75 lung squamous cell carcinoma patients**

| Characteristics           | Cases | PLANE abundance in Lung squamous cell carcinoma(RS <sup>1</sup> ) | <i>P</i> value <sup>2</sup> |
|---------------------------|-------|-------------------------------------------------------------------|-----------------------------|
| <b>Gender</b>             | 75    |                                                                   |                             |
| Male                      | 69    | 0.75 ± 0.11 <sup>(3)</sup>                                        | 0.102                       |
| Female                    | 6     | 0.10 ± 0.15                                                       |                             |
| <b>Age</b>                | 75    |                                                                   |                             |
| ≥62 <sup>(4)</sup>        | 39    | 0.87 ± 0.16                                                       | 0.101                       |
| <62                       | 36    | 0.51 ± 0.12                                                       |                             |
| <b>TNM Stage</b>          | 75    |                                                                   |                             |
| I                         | 28    | 0.73 ± 0.17                                                       | 0.808                       |
| II/III                    | 35    | 0.67 ± 0.15                                                       |                             |
| <b>Histological Grade</b> | 75    |                                                                   |                             |
| I/II                      | 55    | 0.65 ± 0.12                                                       | 0.447                       |
| II-III/III                | 20    | 0.84 ± 0.23                                                       |                             |

<sup>1</sup>RS: Reactive score

<sup>2</sup>Two-tailed Student's *t*-test; a *P* value less than 0.05 was considered statistically significant

<sup>3</sup>Data shown are mean ± s.e.m.

<sup>4</sup>The median age of the patients in this cohort was 62

**Supplementary Table 2. Summary of clinicopathological characteristics of the cohort of 92 lung adenocarcinoma patients**

| Characteristics           | Cases | PLANE abundance in Lung squamous cell carcinoma(RS <sup>1</sup> ) | <i>P</i> value <sup>2</sup> |
|---------------------------|-------|-------------------------------------------------------------------|-----------------------------|
| <b>Gender</b>             | 92    |                                                                   |                             |
| Male                      | 51    | 0.34 ± 0.08 <sup>(3)</sup>                                        | 0.325                       |
| Female                    | 41    | 0.48 ± 0.11                                                       |                             |
| <b>Age</b>                | 92    |                                                                   |                             |
| ≥63 <sup>(4)</sup>        | 48    | 0.47 ± 0.11                                                       | 0.339                       |
| <63                       | 44    | 0.34 ± 0.04                                                       |                             |
| <b>TNM Stage</b>          | 67    |                                                                   |                             |
| I /II                     | 41    | 0.55 ± 0.12                                                       | 0.276                       |
| II/III                    | 26    | 0.35 ± 0.10                                                       |                             |
| <b>Histological Grade</b> | 92    |                                                                   |                             |
| I/II                      | 57    | 0.33 ± 0.07                                                       | 0.143                       |
| III                       | 35    | 0.54 ± 0.13                                                       |                             |

<sup>1</sup>RS: Reactive score

<sup>2</sup>Two-tailed Student's; a *P* value less than 0.05 was considered statistically significant

<sup>3</sup>Data shown are mean ± s.e.m.

<sup>4</sup>The median age of the patients in this cohort was 63



**Supplementary Table 3. Summary of clinicopathological characteristics of the cohort of 89 colon cancer patients**

| <b>Characteristics</b>    | <b>Cases</b> | <b>PLANE abundance in Lung squamous cell carcinoma(RS<sup>1</sup>)</b> | <b>P value<sup>2</sup></b> |
|---------------------------|--------------|------------------------------------------------------------------------|----------------------------|
| <b>Gender</b>             | 89           |                                                                        |                            |
| Male                      | 51           | 0.43 ± 0.08 <sup>(3)</sup>                                             | 0.239                      |
| Female                    | 38           | 0.61 ± 0.12                                                            |                            |
| <b>Age</b>                | 89           |                                                                        |                            |
| ≥68 <sup>(4)</sup>        | 42           | 0.41 ± 0.09                                                            | 0.203                      |
| <68                       | 47           | 0.66 ± 0.11                                                            |                            |
| <b>TNM Stage</b>          | 80           |                                                                        |                            |
| I/II                      | 43           | 0.66 ± 0.11                                                            | 0.054                      |
| III/IV                    | 37           | 0.35 ± 0.10                                                            |                            |
| <b>Histological Grade</b> | 89           |                                                                        |                            |
| I/II                      | 72           | 0.52 ± 0.07                                                            | 0.750                      |
| II-III/III                | 17           | 0.46 ± 0.21                                                            |                            |

<sup>1</sup>RS: Reactive score

<sup>2</sup>Two-tailed Student's; a *P* value less than 0.05 was considered statistically significant

<sup>3</sup>Data shown are mean ± s.e.m.

<sup>4</sup>The median age of the patients in this cohort was 68

**Supplementary Table 4. List of siRNAs/shRNAs**

|             |                                                                              |
|-------------|------------------------------------------------------------------------------|
| PLANE       | siRNA.1/shRNA.1: GACCCAAAGAGCAAGUCAU<br>siRNA.2/shRNA.2: GCUCAGAAUCACUAGAAUG |
| NCOR2-138nt | siRNA.1: UGCUGACGGACGGAGUGACCACACA<br>siRNA.2: AAUGC UUUUAACCCUCUGAAUGCCA    |
| NCOR2       | siRNA: UGGUGGAGGAUGAGGAGAU                                                   |
| hnRNPM      | siRNA.1: GCAUCGGAAUGGGAAACAU<br>siRNA.2: CCAUUUGACUGUUUGCAU                  |
| MELTF       | siRNA.1: GGAUGGAGGAGCCAUCUAU<br>siRNA.2: GGGCGAAGUGUACGAUCAA                 |

**Supplementary Table 5. Summary of proteins that interact with PLANE detected using mass spectrometry**

| No. | Entry name | Coverage [%] | MW [kDa] | Score  |
|-----|------------|--------------|----------|--------|
| 1   | HNRPM      | 32           | 77.5     | 139.38 |
| 2   | K2C1       | 24           | 66       | 40.71  |
| 3   | K1C10      | 22           | 58.8     | 30.7   |
| 4   | K22E       | 21           | 65.4     | 28.63  |
| 5   | NUCL       | 11           | 76.6     | 19.43  |
| 6   | F5H5D3     | 17           | 57.7     | 18.9   |
| 7   | K1C9       | 15           | 62       | 18.85  |
| 8   | TBA1A      | 20           | 50.1     | 18.12  |
| 9   | Q5ST81     | 16           | 41.7     | 12.98  |
| 10  | RFA1       | 10           | 68.1     | 12.31  |
| 11  | BIP        | 7            | 72.3     | 9.96   |
| 12  | WDR76      | 6            | 69.7     | 8.81   |
| 13  | TBB2A      | 14           | 49.9     | 8.8    |
| 14  | E7EWK3     | 4            | 91.4     | 8.17   |
| 15  | HNRPK      | 9            | 50.9     | 7.68   |
| 16  | H0YIN9     | 16           | 22       | 7.62   |
| 17  | CSTF3      | 3            | 82.9     | 7.53   |
| 18  | E7EUT5     | 9            | 27.9     | 6.97   |
| 19  | DDX3X      | 4            | 73.2     | 5.85   |
| 20  | PLOD1      | 2            | 83.5     | 5.85   |
| 21  | A6NLN1     | 7            | 56.5     | 5.39   |
| 22  | PCBP1      | 10           | 37.5     | 5.35   |
| 23  | IF4A1      | 8            | 46.1     | 4.87   |
| 24  | TOP2A      | 2            | 174.3    | 4.71   |
| 25  | E9PKE3     | 5            | 68.8     | 4.65   |
| 26  | J3KTA4     | 4            | 69       | 4.61   |
| 27  | YBOX3      | 5            | 40.1     | 4.44   |
| 28  | D6RBZ0     | 7            | 35.7     | 4.37   |
| 29  | J3KT29     | 15           | 13.2     | 3.97   |
| 30  | HNRPF      | 4            | 45.6     | 3.48   |
| 31  | M0R076     | 11           | 13.1     | 3.4    |
| 32  | API5       | 3            | 59       | 3.31   |
| 33  | DDX21      | 3            | 87.3     | 3.25   |
| 34  | WDR43      | 2            | 74.8     | 3.09   |
| 35  | H3BSS4     | 11           | 19.4     | 3.01   |
| 36  | K1C14      | 3            | 51.5     | 2.92   |
| 37  | M0R1V7     | 25           | 7.1      | 2.91   |
| 38  | I3L239     | 7            | 24.9     | 2.89   |
| 39  | F5GYT8     | 2            | 64       | 2.77   |
| 40  | RBM14      | 2            | 69.4     | 2.59   |
| 41  | E9PQD7     | 6            | 25.2     | 2.51   |
| 42  | A2A3R5     | 8            | 25       | 2.44   |
| 43  | H0Y449     | 5            | 42       | 2.4    |
| 44  | G3XAC6     | 3            | 48       | 2.39   |
| 45  | NOG1       | 2            | 73.9     | 2.34   |
| 46  | TGFB3      | 3            | 47.3     | 2.33   |

**Supplementary Table 5, continued**

|    |            |    |       |      |
|----|------------|----|-------|------|
| 47 | RS8        | 7  | 24.2  | 2.3  |
| 48 | PURB       | 4  | 33.2  | 2.29 |
| 49 | D6RG13     | 8  | 25.6  | 2.25 |
| 50 | A0A087WVQ9 | 3  | 47.9  | 2.21 |
| 51 | RS23       | 8  | 15.8  | 2.19 |
| 52 | B5MCT8     | 6  | 16.6  | 2.17 |
| 53 | ALBU       | 2  | 69.3  | 2.17 |
| 54 | FILA2      | 1  | 247.9 | 2.14 |
| 55 | B7ZM68     | 1  | 129.4 | 2.14 |
| 56 | F8WA26     | 19 | 18.5  | 0    |
| 57 | BROMI      | 3  | 144.7 | 0    |
| 58 | AMD        | 3  | 108.3 | 0    |

---

**Supplementary Table 6. Sequence similarity of transcripts in other species compared with human PLANE**

| <b>Description</b> | <b>Total score</b> | <b>Query cover</b> | <b>E value</b> |
|--------------------|--------------------|--------------------|----------------|
| Homo sapiens       | 1716               | 100%               | 0.0            |
| Gorillas           | 1467               | 92%                | 0.0            |
| Mus musculus       | 122                | 7%                 | 2e-12          |

**Supplementary Table 7. List of cell lines**

| <b>Cell lines</b> | <b>Source</b>                                                                                                                                           | <b>Catalogue No.</b> |
|-------------------|---------------------------------------------------------------------------------------------------------------------------------------------------------|----------------------|
| A549              | ATCC                                                                                                                                                    | CCL-185              |
| MCF-7             | ATCC                                                                                                                                                    | HTB-22               |
| HCT116            | ATCC                                                                                                                                                    | CCL-247              |
| H1299             | National Science and Technology Infrastructure (NSTI, Shanghai, China)                                                                                  | SCSP-589             |
| CCC-HSF-1         | National Infrastructure of Cell Line Resource (NICR, Beijing, China)                                                                                    | 3111C0001CCC000069   |
| CCC-HIE-2         | National Infrastructure of Cell Line Resource (NICR, Beijing, China)                                                                                    | 3111C0001CCC000178   |
| Eca109            | Dr Xiao Ying Liu (Translational Research Institute, Henan Provincial People's Hospital and People's Hospital of Zhengzhou University, Zhengzhou, China) | N/A                  |
| NCI-H1975         | Prof Xiaoju Zhang (Respiration Department, Henan Provincial People's Hospital, Zhengzhou, China)                                                        | N/A                  |
| NCI-H226          | Prof Xiaoju Zhang (Respiration Department, Henan Provincial People's Hospital, Zhengzhou, China)                                                        | N/A                  |

**Supplementary Table 8. List of antibodies**

| Antibody (Ab)                                                                   | Catalogue No. | Company                                            | Dilution |
|---------------------------------------------------------------------------------|---------------|----------------------------------------------------|----------|
| E2F1 Rabbit mAb                                                                 | ab179445      | Abcam (Cambridge, UK)                              | 1:1000   |
| H3K4me3 Rabbit mAb                                                              | ab1012        | Abcam (Cambridge, UK)                              | 1:500    |
| H3K27me3 Rabbit mAb                                                             | ab192985      | Abcam (Cambridge, UK)                              | 1:1000   |
| Normal mouse IgG                                                                | sc-2025       | Santa Cruz Biotechnology (Dallas, TX)              | 1: 500   |
| Normal rabbit IgG mAb                                                           | ab172730      | Abcam (Cambridge, UK)                              | 1:1000   |
| HRP Conjugated AffiniPure Goat Anti-mouse IgG (H+L)                             | BA1050        | BOSTER Biological Technology (Wuhan, Hubei, P.R.C) | 1:2000   |
| HRP Conjugated AffiniPure Goat Anti-rabbit IgG (H+L)                            | BA1054        | BOSTER Biological Technology (Wuhan, Hubei, P.R.C) | 1:2000   |
| hnRNPM Rabbit pAb                                                               | 26897-1-AP    | Proteintech Group (Wuhan, Hubei, P.R.C)            | 1:500    |
| SC35 Mouse mAb                                                                  | ab11826       | Abcam (Cambridge, UK)                              | 1:500    |
| CY3 Conjugated AffiniPure Goat Anti-rabbit IgG (H+L)                            | BA1032        | BOSTER Biological Technology (Wuhan, Hubei, P.R.C) | 1:200    |
| Chicken anti-Mouse IgG (H+L) Cross-Adsorbed Secondary Antibody, Alexa Fluor 488 | A21200        | Thermo Fisher Scientific (Waltham, MA)             | 1:1000   |
| U1-70K Rabbit pAb                                                               | ab51266       | Abcam (Cambridge, UK)                              | 1:2000   |
| hnRNPK Rabbit mAb                                                               | ab52600       | Abcam (Cambridge, UK)                              | 1:10000  |
| NCOR2 Rabbit mAb                                                                | #62370        | Cell Signaling Technology (Danvers, MA))           | 1:1000   |

mAb: monoclonal antibody

pAb: polyclonal antibody

**Supplementary Table 9. List of reagents**

| <b>Reagent</b>                              | <b>Catalogue No.</b> | <b>Company</b>                                                |
|---------------------------------------------|----------------------|---------------------------------------------------------------|
| Doxycycline                                 | D9891                | Sigma-Aldrich (Saint Louis, MO)                               |
| Piece <sup>TM</sup> RIPA Buffer             | 89900                | Thermo Fisher Scientific (Waltham, MA)                        |
| Piece <sup>®</sup> IP Lysis Buffer          | 87787                | Thermo Fisher Scientific (Waltham, MA)                        |
| BrdU Cell Proliferation Assay Kit           | 6813                 | Cell Signaling Technology (Danvers, MA)                       |
| Protease Inhibitor Cocktail                 | HY-K0010             | Med Chem Express (Monmouth Junction, NJ)                      |
| RiboLock RNase Inhibitor                    | EO0384               | Thermo Fisher Scientific (Waltham, MA)                        |
| 4% paraformaldehyde                         | AR1068               | BOSTER Biological Technology (Wuhan, Hubei, P.R.C)            |
| Opti-MEM <sup>TM</sup> Reduced Serum Medium | 31985070             | Thermo Fisher Scientific (Waltham, MA)                        |
| DNA extraction buffer                       | P1012                | Solarbio Life Sciences (Beijing, P.R.C)                       |
| Protease K                                  | P1120                | Solarbio Life Sciences (Beijing, P.R.C)                       |
| Anti-GFP mAb-Magnetic Agarose               | D153-10              | Medical& Biological Laboratories (Sakae, Nagoya, Aichi,Japan) |
| TRIzol <sup>TM</sup> Reagent                | 15596018             | Thermo Fisher Scientific (Waltham, MA)                        |



**Supplementary Table 10. List of primers used for recombinant plasmid**

|                                       |                                                                                                                                                                                |
|---------------------------------------|--------------------------------------------------------------------------------------------------------------------------------------------------------------------------------|
| pcDNA3.1(+)-PLANE                     | Forward: CGGGATCCGCTGTCCCACGCGCCGGGT<br>Reverse: AACCTCGAGTGCATGTTCTCCAGATGTCCT                                                                                                |
| pcDNA3.1(+)-PLANE-R                   | Forward1: CGGGATCCGCTGTCCCACGCGCCGGGT<br>Reverse1: CTGAAATGACGGTCTCGTTCTATC<br>Forward2: GATAGAACGAGACCGTCATTTTCAG<br>Reverse2: AACCTCGAGTGCATGTTCTCCAGATGTCCT                 |
| pcDNA3.1(+)-PLANE- $\Delta$ DFO       | Forward1: GGATCCGCTGTCCCACGCGCCGGGT<br>Reverse1: GCGCAGGTAGGACTGCTATTCAGAC<br>Forward2: CTGAATAGCAGTCTACCTGCGCCC<br>Reverse2: CTCGAGTGCATGTTCTCCAGATGTCCT                      |
| pcDNA3.1(+)-PLANE-R- $\Delta$ 331-751 | Forward1: GGGATCCGCTGTCCCACGCGCCGGGT<br>Reverse1: TGATATTCTGTGACTGGTTCAGACCCCTTCA<br>Forward2: GAAGGGGTCTGAACCAGTCACAGAATATCAG<br>Reverse2: CCTCGAGTGCATGTTCTCCAGATGTCCT       |
| pEGFP-C1-hnRNPM                       | Forward: TAGGTACCATGGCGGCAGGGGTCTGAAG<br>Reverse: CGGGATCCTTAAGCGTTTCTATCAATTCGAAC                                                                                             |
| pEGFP-C1-hnRNPM- $\Delta$ RRM1        | Forward1: TAGGTACCATGGCGGCAGGGGTCTGAAG<br>Reverse1: TGTTACCATCAGGCTGTATCTTTTAGT<br>Forward2: ACTAAAAGATACAGCCTGATGGTGAACA<br>Reverse2: CGGGATCCTTAAGCGTTTCTATCAATTCGAAC        |
| pEGFP-C1-hnRNPM- $\Delta$ RRM2        | Forward1: TAGGTACCATGGCGGCAGGGGTCTGAAG<br>Reverse1: TGGTAAGGCCCTCTCACTGTGCTTCCAAGTC<br>Forward2: GACTTGGAAGCACAGTGAGAGGGCCTTACCA<br>Reverse2: CGGGATCCTTAAGCGTTTCTATCAATTCGAAC |
| pEGFP-C1-hnRNPM- $\Delta$ RRM3        | Forward: TAGGTACCATGGCGGCAGGGGTCTGAAG<br>Reverse: CGGGATCCTGGCAGGCCTTCTGGCCA                                                                                                   |

**Supplementary Table 11. List of qRT-PCR primers**

|                               |                                                                       |
|-------------------------------|-----------------------------------------------------------------------|
| PLANE                         | Forward: TACATACAGTGACCCAAAGAGCA<br>Reverse: CAGTGCTTCTGAACGCCTCTT    |
| E2F1                          | Forward: CACTTTCGGCCCTTTTGCTC<br>Reverse: GATTCCCCAGGCTCACCAA         |
| NCOR2 pre-mRNA                | Forward: GGCTTCTTGGCCCATCT<br>Reverse: AAGGCTCCCTGACTCCC              |
| NCOR2-001/005-like variants   | Forward: ATGACCAGTGGGAAGAGTCCCCG<br>Reverse: TGGTCACTCCGTCCGTCAGCA    |
| NCOR2-001/005/202/002/201/203 | Forward: AAGAGCTCGACAAGAGCCAC<br>Reverse: CTGGTGACCTTTGACCCCTG        |
| NCOR2-018/203                 | Forward: TGCTGACGGACGGAGTGACC<br>Reverse: TCCGGCGGTTGCAGTCTC          |
| NCOR2-017                     | Forward: GCACCAGGTTCCACGCCATT<br>Reverse: CCCGCCCTGTTCTGAGTCACT       |
| NCOR2 mRNA nuclear export     | Forward: GGCCTGGCATCTGGGGA<br>Reverse: GACGAGGGCCTGTCCTCCCA           |
| GAPDH                         | Forward: GCTCTCTGCTCCTCCTGTTC<br>Reverse: ACGACCAAATCCGTTGACTC        |
| $\beta$ -actin                | Forward: GGACTTCGAGCAAGAGATGG<br>Reverse: AGCACTGTGTTGGCGTACAG        |
| U6                            | Forward: TCGCTTCGGCAGCACATAT<br>Reverse: ATTTGCGTGTCATCCTTGC          |
| 18S rRNA                      | Forward: GCTTAATTTGACTCAACACGGGA<br>Reverse: AGCTATCAATCTGTCAATCCTGTC |
| MELTF                         | Forward: GAGCCCCCTGGAGAGATACT<br>Reverse: CATCGTCCTACGTGCTTCT         |

**Supplementary Table 12. List of RT-PCR primers and RNA pulldown probes**

|                                   |                                                                                                            |
|-----------------------------------|------------------------------------------------------------------------------------------------------------|
| ChIP-E2F1-BR                      | Forward: AGGGGGGCAGGGCTAGTAG<br>Reverse: ACCTAGATCCTGCCTCCC                                                |
| NCOR2-202/017-generating AS event | Forward: GAACATGCCAGCACCAACA<br>Reverse: GGAATGGCGTGGAACCTG                                                |
| ChIP-H3K4me3-BS/-H3K27me3-BS      | Forward: AACGCGATTCCAGTGAGGT<br>Reverse: GCGACGCCGAGTTTCTTT                                                |
| MELTF-AS1-201                     | Forward: CTGCTGAGACGACATCCCTT<br>Reverse: ACGCCCAGCTCACCTGAT                                               |
| MELTF-AS1-202 (PLANE): primer1    | Forward: TACATACAGTGACCCAAAGAGCA<br>Reverse: CAGTGCTTCTGAACGCCTCTT                                         |
| MELTF-AS1-202 (PLANE): primer2    | Forward: TGAGACGACATCCCTTCC<br>Reverse: TGCTCTTTGGGTCACTGTAT                                               |
| MELTF-AS1-203                     | Forward: GCAACCCACGCTTCGAG<br>Reverse: TCCTGCCTCCCAAGGTG                                                   |
| MELTF-AS1-204                     | Forward: CTCCCCACAAACCTAAACA<br>Reverse: GTAGCCACAGAACGGTCAT                                               |
| MELTF-AS1-205                     | Forward: GCGGCGCCTCAGATGC<br>Reverse: GAGTGTGAACGCTCAAAACGG                                                |
| dChIRP-PLANE                      | Forward: CTGGACTGCTGCGAACG<br>Reverse: TGGCTGGGGCTGGACTA                                                   |
| dChIRP-intron 45                  | Forward: CTTGTGACTTTATTTTTGTGCGTGT<br>Reverse: CAAGGAGACAGATGGGCCAAG                                       |
| dChIRP-intron 47                  | Forward: CCATCACTCGCAGGACCAAG<br>Reverse: TGTAATGACAGAATACCACCACC                                          |
| PLANE-BR/ <i>NCOR2</i> gene       | Forward: CTTGTGACTTTATTTTTGTGCGTGT<br>Reverse: CAAGGAGACAGATGGGCCAAG                                       |
| RRBP1                             | Forward: AGGTCCTGGAGGTGCCATTTT<br>Reverse: GCCAGGTGTCCTGAATGATGC                                           |
| DNHD1                             | Forward: GCCCATCTTTGATACCTTC<br>Reverse: CTAACCAGACCTCGTGCC                                                |
| ADH6                              | Forward: TGTAAGCAGCAGGAGCA<br>Reverse: CAGCAACCAGTTTAGGGA                                                  |
| SLC25A4                           | Forward: GTCCTGCGTTGCTAAGACA<br>Reverse: ACAGGCATGAGCCACAGCA                                               |
| PTPN4                             | Forward: AGTAAGCCCTTGGCACGGA<br>Reverse: ACATTGAATCCAAACCTCCC                                              |
| hnRNPM-BS (intron 45)             | Forward: GGCTTCTTGGCCCATCT<br>Reverse: AAGGCTCCCTGACTCCC                                                   |
| lncCyt b                          | Forward: TTGTTTGATCCCGTTTCGTG<br>Reverse: ACATCGGCATTATCCTCCTG                                             |
| hnRNPM-BS (105067-105217)         | Forward: GCTGTGAGGACTGGGTG<br>Reverse: TGGCACATGGGAAGAAG                                                   |
| hnRNPM-BS (158355-158512)         | Forward: GGCGTAAAGCCATCGTG<br>Reverse: AGCCCGTGTTCAAGTCC                                                   |
| hnRNPM-BS (176814-177141)         | Forward: TCTCGGTAATGCCCTTTG<br>Reverse: AAGCCCAGACCCTCCAA                                                  |
| PLANE-biotin-probes               | AS1: ATGACTTGCTCTTTGGGTC<br>AS2: CATTCTAGTGATTCTGAGC<br>S1: GACCCAAAGAGCAAGTCAT<br>S2: GCTCAGAATCACTAGAATG |

---

**Supplementary Table 12, continued**

---

|                                                     |                                                                                                                                                                                  |
|-----------------------------------------------------|----------------------------------------------------------------------------------------------------------------------------------------------------------------------------------|
| NCOR2 pre-mRNA-biotin-probes                        | AS1: TTGGACAACTGCAACTCTC<br>AS2: GTCTGCTGTTTGCAATAGC<br>AS3: TAAACTGTCTGCTGTTTGC<br>S1: GAGAGTTGCAGTTGTCCAA<br>S2: GCTATTGCAAACAGCAGAC<br>S3: GCAAACAGCAGACAGTTTA                |
| PLANE-Cy3-probes                                    | AS1: AAAGCAATTTGCAGCTAGC<br>AS2: ATGACTTGCTCTTTGGGTC<br>AS3: CATTCTAGTGATTCTGAGC                                                                                                 |
| NCOR2 pre-mRNA-Cy3-probes                           | AS1: TTGGACAACTGCAACTCTC<br>AS2: GTCTGCTGTTTGCAATAGC<br>AS3: TAAACTGTCTGCTGTTTGC                                                                                                 |
| PLANE ( <i>in vitro</i> transcription)              | Forward:<br>TAATACGACTCACTATAGGGGCTGTCCCACGCGC<br>CGGGT<br>Reverse:<br>TGCATGTTCTCCAGATGTCCTTTAT                                                                                 |
| AS PLANE ( <i>in vitro</i> transcription)           | Forward:<br>TAATACGACTCACTATAGGGTGCATGTTCTCCAGA<br>TGTCCTTT<br>Reverse: GCTGTCCCACGCGCCGGGTCCC                                                                                   |
| PLANE $\Delta$ DFO ( <i>in vitro</i> transcription) | Forward1:<br>TAATACGACTCACTATAGGGGCTGTCCCACGCGC<br>CGGGT<br>Reverse1:<br>GCGCAGGTAGGACTGCTATTCAGAC<br>Forward2: CTGAATAGCAGTCCTACCTGCGCCC<br>Reverse2: TGCATGTTCTCCAGATGTCCTTTAT |
| PLANE 1-330 ( <i>in vitro</i> transcription)        | Forward:<br>TAATACGACTCACTATAGGGGCTGTCCCACGCGC<br>CGGGT<br>Reverse: TTCAGACCCCTTCACCCCAGAAC                                                                                      |
| PLANE 331-751 ( <i>in vitro</i> transcription)      | Forward:<br>TAATACGACTCACTATAGGGGTTCTGGGGTGAAG<br>GGGTCTG<br>Reverse: GTTGCAGAACACAAGTCCCTCTCGA                                                                                  |
| PLANE 752-951 ( <i>in vitro</i> transcription)      | Forward:<br>TAATACGACTCACTATAGGGCAGTCACAGAATATC<br>AGGTGAGC<br>Reverse: TGCATGTTCTCCAGATGTCCTTTAT                                                                                |
| NCOR2 intron45 ( <i>in vitro</i> transcription)     | Forward:<br>TAATACGACTCACTATAGGGTCTGTCTGTCTGTCT<br>CTCTCTC<br>Reverse: CTGCAGGGGGACAAGATGGG                                                                                      |
| NCOR2 intron47 ( <i>in vitro</i> transcription)     | Forward:<br>TAATACGACTCACTATAGGGTCAGGTCCCAGCGA<br>GCCA<br>Reverse: GGAGTATAATTCGCTTTTAAATTAG                                                                                     |

---

**Supplementary Table 12, continued**

---

|                                                                     |                                                                                                                                                                                                   |
|---------------------------------------------------------------------|---------------------------------------------------------------------------------------------------------------------------------------------------------------------------------------------------|
| NCOR2-intron 45- $\Delta$ PLANE-BR ( <i>In vitro</i> transcription) | Forward1:<br>TAATACGACTCACTATAGGGTCTGTCTGTCTGTCT<br>CTCTCTC<br>Reverse1:<br>GGCGGACAGCAGTGTGAGTGTGGCAGGAGGGC<br>Forward2:<br>GCCCTCCTGCCC ACACTCACACTGCTGTCCGCC<br>Reverse2: CTGCAGGGGGACAAGATGGG |
|---------------------------------------------------------------------|---------------------------------------------------------------------------------------------------------------------------------------------------------------------------------------------------|

---
